# Supplementary material for: Diagnostic accuracy of SPECT, PET, and MRS for primary central nervous system lymphoma in HIV patients: A systematic review and meta-analysis
Source: PubMed Central journal article supplement (PMC5428578; doi:10.1097/md.0000000000006676), 2017-05-12
Supplement: medi-96-e6676-s002.pdf [file medi-96-e6676-s002.pdf]

**Supplemental Table 1: study and patient characteristics of eligible SPECT studies**

| study                           | Year of publication | Analytical method | Number of patients | Mean age (age range)(y) | Imaging method | tracer         | Study design  | Country | Reference standard             | Final non-lymphoma diagnoses                                                                                                                          |
|---------------------------------|---------------------|-------------------|--------------------|-------------------------|----------------|----------------|---------------|---------|--------------------------------|-------------------------------------------------------------------------------------------------------------------------------------------------------|
| O'Malley et al. <sup>16</sup>   | 1994                | quantitative      | 13                 | 34(26-47)               | SPECT          | 201-Tl         | prospective   | USA     | pathology, follow up           | 5 TE,1 PML,1 venous angioma                                                                                                                           |
| Ruiz et al. <sup>17</sup>       | 1994                | visual            | 37                 | 34(26-46)               | SPECT          | 201-Tl         | prospective   | USA     | pathology, serology, follow up | 24 TE,1 mycobacterium tuberculosis abscess                                                                                                            |
| Lorberboym et al. <sup>14</sup> | 1996                | quantitative      | 18                 | 39(29-53)               | SPECT          | 201-Tl         | prospective   | USA     | pathology, serology, follow up | 8 TE,1 cryptococcosis,1 metastatic adenocarcinoma                                                                                                     |
| D'Amico et al. <sup>24</sup>    | 1997                | quantitative      | 37                 | 34.7(25-64)             | SPECT          | 201-Tl         | prospective   | Italy   | pathology, follow up           | 24 TE,1 TB                                                                                                                                            |
| Castagna et al. <sup>11</sup>   | 1997                | quantitative      | 27                 | NA                      | SPECT          | 201-Tl         | prospective   | Italy   | pathology, serology            | 17 TE, 1 TB                                                                                                                                           |
| Miller et al. <sup>10</sup>     | 1998                | quantitative      | 30                 | 36(27-55)               | SPECT          | 201-Tl         | retrospective | UK      | pathology, serology, follow up | NA                                                                                                                                                    |
| Kessler et al. <sup>41</sup>    | 1998                | quantitative      | 162                | NA                      | SPECT          | 201-Tl         | retrospective | USA     | pathology, serology, follow up | NA                                                                                                                                                    |
| Shyam babu et al. <sup>5</sup>  | 2012                | visual            | 18                 | 38.3(16-58)             | SPECT          | 99m-Tc         | prospective   | India   | pathology, serology, follow up | 15 TE, 1 PML, 1 encephalitis (probable tuberculoma)                                                                                                   |
| Sakamoto et al. <sup>51</sup>   | 2014                | visual            | 13                 | 41(33-62)               | SPECT          | 201-Tl         | retrospective | Japan   | pathology, serology, follow up | 11 TE, 1 TE and cryptococcosis                                                                                                                        |
| Hussain et al. <sup>45</sup>    | 2016                | visual            | 68                 | NA                      | SPECT          | 201-Tl         | retrospective | USA     | pathology                      | NA                                                                                                                                                    |
| Lorberboym et al. <sup>42</sup> | 1998                | quantitative      | 49                 | 39(26-53)               | SPECT          | 201-Tl         | prospective   | USA     | pathology, follow up           | 22 TE, 1 TB,1 metastatic adenocarcinoma, 1 cryptococcosis, 1 cerebral gliosis                                                                         |
| DeLaPena et al. <sup>37</sup>   | 1998                | quantitative      | 36                 | 33.2(21-47)             | SPECT          | 201-Tl, 99m-Tc | prospective   | USA     | pathology, follow up           | 16 TE, 1 PML, 1 abscess, 1 microabscesses, 1 gliosis and chronic inflammation, 2 demyelinating process, 1 Candida tropicalis, 1 subacute encephalitis |
| Antinori et al. <sup>13</sup>   | 1999                | visual            | 31                 | 38                      | SPECT          | 201-Tl         | prospective   | Italy   | pathology, serology, follow up | 10 TE, 1 PML,3 CMV encephalitis, 1 VZV encephalitis, 1 cryptococcosis,1 CNS vasculitis,1 TB                                                           |
| Lee et al. <sup>50</sup>        | 1999                | NA                | 21                 | 37(28-72)               | SPECT          | 201-Tl,67-Gl   | retrospective | USA     | pathology                      | 1 astrocytoma, 1 glioblastoma, 3 PML, 5 infection, 1 infarct, 1 hemorrhage                                                                            |

|                               |      |              |    |             |       |                   |               |       |                                |                                                                               |
|-------------------------------|------|--------------|----|-------------|-------|-------------------|---------------|-------|--------------------------------|-------------------------------------------------------------------------------|
| Skiest et al. <sup>44</sup>   | 2000 | visual       | 38 | 35          | SPECT | 201-Tl            | retrospective | USA   | pathology, serology, follow up | 17 TE, 3 PML, 1 TB, 1 aspergillus, 1 cryptococcosis, 1 varicella-zoster virus |
| Licho et al. <sup>25</sup>    | 2002 | visual       | 14 | (28-55)     | SPECT | 201-Tl            | prospective   | USA   | pathology                      | 5 TE, 1 PML, 1 HSV, 2 gliosis                                                 |
| Naddaf et al. <sup>15</sup>   | 1998 | quantitative | 17 | NA          | SPECT | 201-Tl,<br>99m-Tc | prospective   | USA   | pathology, serology, follow up | 9 TE, 2 PML, 1 necrosis, 1 haemorrhage                                        |
| Giancola et al. <sup>46</sup> | 2004 | quantitative | 38 | 41.5(36-45) | SPECT | 201-Tl            | prospective   | Italy | serology                       | 19 TE, 4 EUO, 5 PML, 1 TB, 1 metastatic lesion, 1 cryptococcosis              |

**note:-NA indicates the data not available; 201-Tl, thallium-201 chloride; 99m-Tc, technetium sestamibi; 67-Gl, gallium-67; TE, toxoplasma encephalitis; PML, progressive multifocal leukoencephalopathy; TB, tuberculosis; HSV, herpes simplex virus; EUO, encephalopathy of unknown origin.**

**Supplemental Table 2: study and patient characteristics of eligible PET studies**

| <b>study</b>                     | <b>Year of publication</b> | <b>Analytical method</b> | <b>Number of patients</b> | <b>Mean age (age range)(y)</b> | <b>Imaging method</b> | <b>tracer</b> | <b>Country</b> | <b>Study design</b> | <b>Reference standard</b>      | <b>Final non-lymphoma diagnoses</b>                                |
|----------------------------------|----------------------------|--------------------------|---------------------------|--------------------------------|-----------------------|---------------|----------------|---------------------|--------------------------------|--------------------------------------------------------------------|
| Lewitschnig et al. <sup>20</sup> | 2013                       | visual                   | 29                        | 47(25-79)                      | PET                   | 18F-FDG       | UK             | retrospective       | pathology, follow-up           | 10 TE, 1 PML, 1 non-small cell lung cancer, 12 infectious diseases |
| Pierce et al. <sup>22</sup>      | 1995                       | visual                   | 17                        | 35.9(25-50)                    | PET                   | 18F-FDG       | USA            | prospective         | pathology, serology, follow-up | 8 T,2 PML,1 cryptococcosis                                         |
| Westwood et al. <sup>36</sup>    | 2013                       | visual                   | 10                        | 40(25-74)                      | PET                   | 18F-FDG       | UK             | prospective         | pathology, follow-up           | 6 TE,1 lung cancer metastasis, 1 PML                               |
| Villinger et al. <sup>23</sup>   | 1995                       | quantitative             | 11                        | 39(27-57)                      | PET                   | 18F-FDG       | Germany        | prospective         | pathology, follow-up           | 6 TE, 1 TB                                                         |
| Heald et al. <sup>18</sup>       | 1996                       | quantitative             | 18                        | 38.7(23-66)                    | PET                   | 18F-FDG       | USA            | prospective         | pathology, serology, follow-up | 4 TE, 2PML, 2 syphilis                                             |
| O'Doherty et al. <sup>21</sup>   | 1997                       | quantitative             | 23                        | 29.6(17-53)                    | PET                   | 18F-FDG       | UK             | prospective         | pathology, follow-up           | 13 TE, 3 PML, 1 oligodendroglioma                                  |

**note:-NA indicates the data not available; 18F-FDG, 18F-fluorodeoxyglucose; TE, toxoplasmic encephalitis; PML, progressive multifocal leukoencephalopathy; TB, tuberculosis.**

**Supplemental Table 3: study and patient characteristics of eligible MRS studies**

| <b>study</b>                  | <b>Year<br/>Of publication</b> | <b>Number<br/>of patients</b> | <b>Mean age<br/>(age range)(y)</b> | <b>Imaging<br/>method</b> | <b>Country</b> | <b>Study design</b> | <b>Analytical<br/>method</b> | <b>Reference standard</b>       | <b>Final non-lymphoma diagnoses</b>          |
|-------------------------------|--------------------------------|-------------------------------|------------------------------------|---------------------------|----------------|---------------------|------------------------------|---------------------------------|----------------------------------------------|
| Westwood et al. <sup>36</sup> | 2013                           | 10                            | 40(25-74)                          | MRS                       | UK             | prospective         | Visual                       | pathology, follow-up            | 6 TE,1 lung cancer metastasis, 1 PML         |
| Simone et al. <sup>36</sup>   | 1998                           | 60                            | 32.4(16-64)                        | MRS                       | Italy          | prospective         | quantitative                 | pathology, follow-up            | 20 TE, 8PML, 25 HIV-related encephalopathies |
| Chinn et al. <sup>32</sup>    | 1995                           | 26                            | 39.6(28.8-58)                      | MRS                       | UK             | prospective         | quantitative                 | pathology,serology<br>follow-up | 18 TE                                        |

**note: TE, toxoplasma encephalitis; PML, progressive multifocal leukoencephalopathy.**

**Supplemental Table 4: Quality assessment for 26 articles (QUADAS-2)**

| Study                            | RISK OF BIAS |       |           |            | APPLICABILITY CONCERNS |       |           |
|----------------------------------|--------------|-------|-----------|------------|------------------------|-------|-----------|
|                                  | PATIENT      | INDEX | REFERENCE | FLOW       | PATIENT                | INDEX | REFERENCE |
|                                  | SELECTION    | TEST  | STANDARD  | AND TIMING | SELECTION              | TEST  | STANDARD  |
| Babu et al. <sup>5</sup>         | H            | L     | L         | L          | H                      | L     | L         |
| Licho et al. <sup>25</sup>       | L            | H     | L         | H          | L                      | L     | L         |
| Hussain et al. <sup>45</sup>     | L            | L     | L         | L          | L                      | L     | L         |
| Skiest et al. <sup>44</sup>      | L            | H     | L         | H          | L                      | L     | L         |
| Antinori et al. <sup>13</sup>    | L            | H     | L         | L          | L                      | L     | L         |
| Naddaf et al. <sup>15</sup>      | L            | H     | L         | L          | L                      | L     | L         |
| Miller et al. <sup>10</sup>      | L            | U     | L         | L          | L                      | L     | L         |
| DeLaPena et al. <sup>37</sup>    | L            | L     | L         | H          | L                      | L     | L         |
| Lorberboym et al. <sup>14</sup>  | L            | U     | L         | L          | H                      | L     | L         |
| Kessler et al. <sup>41</sup>     | L            | L     | L         | L          | L                      | L     | L         |
| DAmico et al. <sup>24</sup>      | L            | H     | L         | L          | L                      | L     | L         |
| Lorberboym et al. <sup>42</sup>  | L            | U     | L         | L          | H                      | L     | L         |
| Ruiz et al. <sup>17</sup>        | L            | L     | L         | L          | L                      | L     | L         |
| O'Malley et al. <sup>16</sup>    | L            | L     | L         | H          | L                      | L     | L         |
| Giancola<br>et al. <sup>46</sup> | L            | L     | L         | L          | L                      | L     | L         |
| Sakamoto et al. <sup>51</sup>    | L            | L     | U         | L          | L                      | L     | U         |

|                                  |   |   |   |   |   |   |   |
|----------------------------------|---|---|---|---|---|---|---|
| Castagna et al. <sup>11</sup>    | L | L | L | L | L | L | L |
| Lee et al. <sup>50</sup>         | L | U | L | L | L | U | L |
| Lewitschnig et al. <sup>20</sup> | L | U | L | L | L | L | L |
| Pierce et al. <sup>22</sup>      | L | L | L | H | L | L | L |
| Westwood et al. <sup>36</sup>    | L | L | L | L | H | L | L |
| Villinger et al. <sup>25</sup>   | H | L | L | L | H | L | L |
| Heald et al. <sup>28</sup>       | H | H | L | L | H | L | L |
| ODoherty et al. <sup>21</sup>    | L | L | L | L | H | L | L |
| Simone et al. <sup>36</sup>      | L | L | L | L | H | L | L |
| Chinn et al. <sup>32</sup>       | L | L | L | H | L | L | L |

---

note: L, Low Risk; H, High Risk; U, Unclear Risk.

**Online Table 5: Influence of individual studies for diagnostic performance of SPECT in CNS lymphomas**

| Excluding Study One by One | Pooled Sensitivity (95% CI) | Pooled Specificity (95% CI) | Comparison with Overall (P Value) |             |
|----------------------------|-----------------------------|-----------------------------|-----------------------------------|-------------|
|                            |                             |                             | Sensitivity                       | Specificity |
| Overall                    | 0.92 (0.85 - 0.96)          | 0.84 (0.74 - 0.90)          |                                   |             |
| Antinori et al. 1999       | 0.92 (0.84 - 0.96)          | 0.83 (0.73 - 0.90)          | >0.05                             | >0.05       |
| Babu et al. 2013           | 0.92 (0.85 - 0.96)          | 0.84 (0.74 - 0.91)          | >0.05                             | >0.05       |
| Castagna et al. 1997       | 0.92 (0.85 - 0.96)          | 0.82 (0.73 - 0.89)          | >0.05                             | >0.05       |
| D'Amico et al. 1997        | 0.92 (0.85 - 0.96)          | 0.83 (0.73 - 0.89)          | >0.05                             | >0.05       |
| DeLaPena et al. 1998       | 0.92 (0.85 - 0.96)          | 0.83 (0.73 - 0.89)          | >0.05                             | >0.05       |
| DeLaPena et al. 1998       | 0.92 (0.85 - 0.96)          | 0.83 (0.73 - 0.89)          | >0.05                             | >0.05       |
| Giancola et al. 2004       | 0.92 (0.84 - 0.96)          | 0.84 (0.74 - 0.91)          | >0.05                             | >0.05       |
| Hussain et al. 2016        | 0.93 (0.86 - 0.96)          | 0.84 (0.74 - 0.91)          | >0.05                             | >0.05       |
| Kessler et al. 1998        | 0.89 (0.82 - 0.94)          | 0.82 (0.73 - 0.89)          | >0.05                             | >0.05       |
| Lee et al. 1999            | 0.91 (0.84 - 0.95)          | 0.85 (0.78 - 0.91)          | >0.05                             | >0.05       |
| Lee et al. 1999            | 0.91 (0.84 - 0.95)          | 0.84 (0.75 - 0.91)          | >0.05                             | >0.05       |
| Licho et al. 2002          | 0.93 (0.86 - 0.96)          | 0.85 (0.75 - 0.91)          | >0.05                             | >0.05       |
| Lorberboym et al. 1996     | 0.91 (0.84 - 0.95)          | 0.84 (0.74 - 0.91)          | >0.05                             | >0.05       |
| Lorberboym et al. 1998     | 0.91 (0.83 - 0.96)          | 0.84 (0.75 - 0.91)          | >0.05                             | >0.05       |
| Miller et al. 1998         | 0.92 (0.84 - 0.96)          | 0.85 (0.76 - 0.91)          | >0.05                             | >0.05       |
| Naddaf et al. 1998         | 0.91 (0.84 - 0.95)          | 0.85 (0.76 - 0.91)          | >0.05                             | >0.05       |
| Naddaf et al. 1998         | 0.91 (0.84 - 0.95)          | 0.84 (0.75 - 0.91)          | >0.05                             | >0.05       |
| O'Malley et al. 1994       | 0.91 (0.84 - 0.95)          | 0.84 (0.74 - 0.90)          | >0.05                             | >0.05       |
| Ruiz et al. 1994           | 0.91 (0.84 - 0.95)          | 0.82 (0.73 - 0.89)          | >0.05                             | >0.05       |
| Sakamoto et al. 2014       | 0.92 (0.84 - 0.96)          | 0.83 (0.73 - 0.90)          | >0.05                             | >0.05       |

Skiest et al. 2000

0.92 (0.85 - 0.96)

0.84 (0.74 - 0.90)

>0.05

>0.05

---

note: DeLaPena et al., Lee et al., Naddaf et al. applied two tracers for each single study.
